# Supplementary material for: A combined oncogenic pathway signature of BRAF, KRAS and PI3KCA mutation improves colorectal cancer classification and cetuximab treatment prediction
Source: PubMed Central journal article supplement — Gut. 2012 Jul 14;62(4):540–9. doi: 10.1136/gutjnl-2012-302423 (PMC3596735; doi:10.1136/gutjnl-2012-302423), 2012-07-14
Supplement: gutjnl-2012-302423-s1.pdf [file gutjnl-2012-302423-s1.pdf]

## Supplementary Data

**Table S1. Mutation signature gene lists**

| S1.1 KRAS signature75 genes |                  |                                                                          |
|-----------------------------|------------------|--------------------------------------------------------------------------|
| ID                          | Gene Name        | Description                                                              |
| AK022594                    | AK022594         | Homo sapiens cDNA FLJ12532 fis, clone NT2RM4000200                       |
| AK130878                    | AK130878         | Homo sapiens cDNA FLJ27368 fis, clone UBA03195                           |
| NM_001164                   | APBB1            | Amyloid beta (A4) precursor protein-binding, family B, member 1 (Fe65)   |
| NM_024590                   | ARSJ             | Arylsulfatase family, member J                                           |
| NM_015338                   | ASXL1            | Additional sex combs like 1                                              |
| NM_001677                   | ATP1B1           | ATPase, Na <sup>+</sup> /K <sup>+</sup> transporting, beta 1 polypeptide |
| BC030102                    | BC030102         | cDNA clone IMAGE:4796690                                                 |
| NM_030766                   | BCL2L14          | BCL2-like 14 (apoptosis facilitator)                                     |
| NM_001202                   | BMP4             | Bone morphogenetic protein 4                                             |
| BX647159                    | BX647159         | DKFZp686H14196 (from clone DKFZp686H14196)                               |
| NM_013399                   | C16orf5          | Cell death inducing protein                                              |
| NM_016470                   | C20orf111        | Chromosome 20 open reading frame 111                                     |
| NM_00108047<br>2            | C20orf142        | Fat storage-inducing transmembrane protein 2 (FITM2)                     |
| NM_015511                   | C20orf4          | Chromosome 20 open reading frame 4                                       |
| NM_001218                   | CA12             | Carbonic anhydrase XII                                                   |
| NM_000719                   | CACNA1C          | Calcium channel, voltage-dependent, L type, alpha 1C subunit             |
| NM_032587                   | CARD6            | Caspase recruitment domain family, member 6                              |
| AK098629                    | CNNM3            | Cyclin M3                                                                |
| NM_000784                   | CYP27A1          | Cytochrome P450, family 27, subfamily A, polypeptide 1                   |
| AL390175                    | DKFZp547<br>K054 | ZNF853 zinc finger protein 853                                           |
| NM_012242                   | DKK1             | Dickkopf homolog 1 (Xenopus laevis)                                      |
| NM_001946                   | DUSP6            | Dual specificity phosphatase 6 (DUSP6)                                   |
| NM_207032                   | EDN3             | Endothelin 3 (EDN3),                                                     |
| NM_006208                   | ENPP1            | Ectonucleotidepyrophosphatase/phosphodiesterase 1                        |
| NM_021727                   | FADS3            | Fatty acid desaturase 3                                                  |
| NM_015566                   | FAM169A          | Family with sequence similarity 169, member A                            |
| NM_015101                   | GLT25D2          | Glycosyltransferase 25 domain containing 2                               |
| ENST0000037<br>1081         | GNAS             | Guanine nucleotide-binding protein G(s) subunit alpha isoforms           |
| NM_00103000<br>4            | HNF4A            | Hepatocyte nuclear factor 4, alpha                                       |
| NM_002147                   | HOXB5            | Homeobox B5                                                              |
| NM_018952                   | HOXB6            | Homeobox B6                                                              |
| NM_024016                   | HOXB8            | Homeobox B8                                                              |
| NM_033439                   | IL33             | Interleukin 33                                                           |
| NM_018689                   | KIAA1199         | KIAA1199                                                                 |
| NM_002776                   | KLK10            | Kallikrein-relatedpeptidase 10                                           |
| NM_144947                   | KLK11            | Kallikrein-relatedpeptidase 11                                           |
| NM_019079                   | L1TD1            | LINE-1 type transposase domain containing 1                              |
| NM_00100155                 | LEMD1            | LEM domain containing 1                                                  |

|                     |                  |                                                                                              |
|---------------------|------------------|----------------------------------------------------------------------------------------------|
| 2                   |                  |                                                                                              |
| XM_00171520<br>2    | LOC10013<br>0910 | hypothetical protein LOC100130910                                                            |
| ENST0000039<br>8035 | LOC12037<br>6    | hypothetical protein LOC120376                                                               |
| NM_000239           | LYZ              | Lysozyme (renal amyloidosis)                                                                 |
| NM_000260           | MYO7A            | Myosin VIIA                                                                                  |
| THC2669157          | OIT3             | Oncoprotein induced transcript 3                                                             |
| NM_007350           | PHLDA1           | Pleckstrin homology-like domain, family A, member 1                                          |
| NM_080476           | PIGU             | Phosphatidylinositol glycan anchor biosynthesis, class U                                     |
| NM_032562           | PLA2G12B         | Phospholipase A2, group XIIB                                                                 |
| NM_002657           | PLAGL2           | Pleiomorphic adenoma gene-like 2                                                             |
| NM_172236           | POFUT1           | Protein O-fucosyltransferase 1                                                               |
| NM_080685           | PTPN13           | Protein tyrosine phosphatase, non-receptor type 13 (APO-1/CD95 (Fas)-associated phosphatase) |
| NM_007238           | PXMP4            | Peroxisomal membrane protein 4                                                               |
| NM_014899           | RHOBTB3          | Rho-related BTB domain containing 3                                                          |
| NM_198232           | RNASE1           | Ribonuclease, RNase A family, 1 (pancreatic)                                                 |
| NM_153225           | RPESP            | RPE-spondin (RPESP)                                                                          |
| NM_005980           | S100P            | S100 calcium binding protein P                                                               |
| NM_002639           | SERPINB5         | Serpin peptidase inhibitor, clade B (ovalbumin), member 5                                    |
| NM_003059           | SLC22A4          | Solute carrier family 22 (organic cation/ergothioneine transporter), member 4                |
| NM_000112           | SLC26A2          | Solute carrier family 26 (sulfate transporter), member 2                                     |
| NM_021095           | SLC5A6           | Solute carrier family 5 (sodium-dependent vitamin transporter), member 6                     |
| NM_014331           | SLC7A11          | Solute carrier family 7, (cationic amino acid transporter, y+ system) member 11              |
| NM_019844           | SLCO1B3          | Solute carrier organic anion transporter family, member 1B3                                  |
| NM_032229           | SLITRK6          | SLIT and NTRK-like family, member 6                                                          |
| NM_003098           | SNTA1            | Syntrophin, alpha 1 (dystrophin-associated protein A1, 59kDa, acidic component)              |
| NM_00104263<br>3    | SNX21            | Sorting nexin family member 21                                                               |
| NM_00103495<br>4    | SORBS1           | Sorbin and SH3 domain containing 1                                                           |
| NM_145263           | SPATA18          | Spermatogenesis associated 18 homolog (rat)                                                  |
| NM_006804           | STARD3           | StAR-related lipid transfer                                                                  |
| THC2624002          | THC26240<br>02   | HUMAN (Q9BXR7) Interleukin 10 (Fragment)                                                     |
| THC2634713          | THC26347<br>13   | Unknown                                                                                      |
| THC2699065          | THC26990<br>65   | DTDP-glucose 4,6-dehydratase (Fragment), partial (9%)                                        |
| THC2708669          | THC27086<br>69   | Dihydropteroate synthase (DHPS) (Dihydropteroatepyrophosphorylase) , partial (5%)            |
| NM_138554           | TLR4             | Toll-like receptor 4                                                                         |
| NM_144649           | TMEM71           | Transmembrane protein 71                                                                     |
| BE893137            | TNIK             | TRAF2 and NCK interacting kinase                                                             |
| NM_032865           | TNS4             | Tensin 4                                                                                     |
| NM_021202           | TP53INP2         | Tumor protein p53 inducible nuclear protein 2                                                |

| <b>S1.2 BRAFsignature 58 genes</b> |                  |                                                                                              |
|------------------------------------|------------------|----------------------------------------------------------------------------------------------|
| <b>ID</b>                          | <b>Gene Name</b> | <b>Description</b>                                                                           |
| NM_001009185                       | ACSL6            | Acyl-CoA synthetase long-chain family member 6                                               |
| NM_006408                          | AGR2             | Anterior gradient homolog 2 (Xenopus laevis)                                                 |
| NM_001621                          | AHR              | Aryl hydrocarbon receptor                                                                    |
| NM_001018060                       | AIFM3            | Apoptosis-inducing factor, mitochondrion-associated, 3                                       |
| NM_007193                          | ANXA10           | Annexin A10                                                                                  |
| NM_005224                          | ARID3A           | AT rich interactive domain 3A                                                                |
| NM_005170                          | ASCL2            | Achaete-scute complex homolog 2 (Drosophila)                                                 |
| NM_015338                          | ASXL1            | Additional sex combs like 1 (Drosophila)                                                     |
| NM_004655                          | AXIN2            | Axin 2 (conductin, axil)                                                                     |
| BX427767                           | BX427767         | cDNA clone CS0DM012YK01 3-PRIME                                                              |
| BX647159                           | BX647159         | cDNA DKFZp686H14196                                                                          |
| NM_153256                          | C10orf47         | Chromosome 10 open reading frame 47                                                          |
| NM_018363                          | C10orf59         | RNLS renalase, FAD-dependent amine oxidase                                                   |
| NM_025113                          | C13orf18         | Chromosome 13 open reading frame 18                                                          |
| BC029662                           | C20orf142        | Fat storage-inducing transmembrane protein 2 (FITM2)                                         |
| NM_004364                          | CEBPA            | CCAAT/enhancer binding protein                                                               |
| NM_015147                          | CEP68            | Centrosomal protein 68kDa                                                                    |
| CR616309                           | CR616309         | LIMF1-lipase maturation factor 1                                                             |
| NM_033081                          | DIDO1            | Death inducer-obliterator 1                                                                  |
| XM_085578                          | DNAH2            | Dynein, axonemal, heavy chain 2                                                              |
| NM_152511                          | DUSP18           | Dual specificity phosphatase 18 (DUSP18), mRNA [NM_152511]                                   |
| NM_017549                          | EPDR1            | Ependyminrelatedprotein 1 (zebrafish)                                                        |
| NM_004454                          | ETV5             | Ets variant gene 5 (ets-related molecule)                                                    |
| NM_178026                          | GGT7             | Gamma-glutamyltransferase 7                                                                  |
| NM_000273                          | GPR143           | G protein-coupled receptor 143                                                               |
| NM_024501                          | HOXD1            | Homeobox D1                                                                                  |
| THC2657554                         | KCNK5            | Potassium channel, subfamily K, member 5                                                     |
| AK025743                           | LOC157860        | hypotheticalprotein LOC157860                                                                |
| NM_001013642                       | LOC388610        | hypothetical LOC388610                                                                       |
| NM_000249                          | MLH1             | MutL homolog 1, colon cancer, nonpolyposis type 2 (E. coli)                                  |
| NM_014484                          | MOCS3            | Molybdenum cofactor synthesis 3                                                              |
| NM_024657                          | MORC4            | MORC family CW-type zinc finger 4                                                            |
| NM_033100                          | PCDH21           | Protocadherin 21                                                                             |
| NM_002657                          | PLAGL2           | Pleiomorphic adenoma gene-like 2 (PLAGL2), mRNA [NM_002657]                                  |
| NM_015352                          | POFUT1           | Protein O-fucosyltransferase 1                                                               |
| NM_012094                          | PRDX5            | Peroxiredoxin 5                                                                              |
| NM_030667                          | PTPRO            | Protein tyrosine phosphatase, receptor type, O                                               |
| NM_014298                          | QPRT             | Quinolatephosphoribosyltransferase (nicotinate-nucleotide pyrophosphorylase (carboxylating)) |
| NM_004163                          | RAB27B           | RAB27B, member RAS oncogene family                                                           |
| NM_006834                          | RAB32            | RAB32, member RAS oncogene family 32                                                         |

|           |         |                                                                                 |
|-----------|---------|---------------------------------------------------------------------------------|
| NM_032044 | REG4    | Regenerating islet-derived family, member 4                                     |
| NM_017763 | RNF43   | Ring finger protein 43                                                          |
| NM_001649 | SHROOM2 | shroom family member 2                                                          |
| NM_020717 | SHROOM4 | Shroom family member 4                                                          |
| NM_173596 | SLC39A5 | Solute carrier family 39 (metal ion transporter), member 5                      |
| NM_014331 | SLC7A11 | Solute carrier family 7, (cationic amino acid transporter, y+ system) member 11 |
| NM_019008 | SMCR7L  | Smith-Magenis syndrome chromosome region, candidate 7-like                      |
| NR_003239 | SNHG11  | Small nucleolar RNA host gene (non-protein coding) 11                           |
| NM_014587 | SOX8    | SRY (sex determining region Y)-box 8                                            |
| NM_003122 | SPINK1  | Serine peptidase inhibitor, Kazal type 1                                        |
| NM_005423 | TFF2    | Trefoil factor 2 (spasmolytic protein 1)                                        |
| NM_003279 | TNNC2   | Troponin C type 2 (fast)                                                        |
| BC107798  | TNNT1   | Troponin T type 1 (skeletal, slow)                                              |
| NM_203297 | TRIM7   | Tripartite motif-containing 7                                                   |
| NM_023076 | UNKL    | unkempt homolog (Drosophila)-like                                               |
| NM_006113 | VAV3    | Vav 3 guanine nucleotide exchange factor                                        |
| NM_033132 | ZIC5    | Zic family member 5 (odd-paired homolog, Drosophila)                            |
| NM_080752 | ZSWIM3  | Zinc finger, SWIM-type containing 3                                             |

| <b>S1.3 PIK3CA signature 49 genes</b> |             |                                                                          |
|---------------------------------------|-------------|--------------------------------------------------------------------------|
| <b>ID</b>                             | <b>Name</b> | <b>Description</b>                                                       |
| NM_015338                             | ASXL1       | Additional sex combs like 1 (Drosophila) (ASXL1)                         |
| NM_001677                             | ATP1B1      | ATPase, Na <sup>+</sup> /K <sup>+</sup> transporting, beta 1 polypeptide |
| THC2708669                            | AQP5        | Aquaporin 5                                                              |
| NM_001677                             | ATP1B1      | ATPase, Na <sup>+</sup> /K <sup>+</sup> transporting, beta 1 polypeptide |
| NM_016470                             | C20orf111   | Chromosome 20 open reading frame 111                                     |
| NM_001080472                          | C20orf142   | Fat storage-inducing transmembrane protein 2 (FITM2)                     |
| NM_015511                             | C20orf4     | Chromosome 20 open reading frame 4                                       |
| NM_080748                             | C20orf52    | ROMO1 - reactive oxygen species modulator 1                              |
| NM_004929                             | CALB1       | Calbindin 1                                                              |
| NM_030877                             | CTNBL1      | Catenin, beta like 1                                                     |
| NM_000784                             | CYP27A1     | Cytochrome P450, family 27, subfamily A, polypeptide 1                   |
| NM_033081                             | DIDO1       | Death inducer-obliterator 1                                              |
| NM_052951                             | DNTTIP1     | deoxynucleotidyltransferase, terminal, interacting protein 1             |
| NM_001946                             | DUSP6       | Dual specificity phosphatase 6                                           |
| NM_014183                             | DYNLRB1     | Dynein, light chain, roadblock-type 1                                    |
| NM_002212                             | EIF6        | Eukaryotic translation initiation factor 6                               |
| CR936791                              | FAM169A     | Family with sequence similarity 169, member A                            |
| NM_001452                             | FOXF2       | Forkhead box F2                                                          |
| NM_001098722                          | GNG4        | Guanine nucleotide binding protein (G protein), gamma 4                  |
| NM_000273                             | GPR143      | G protein-coupled receptor 143                                           |
| NM_014278                             | HSPA4L      | Heat shock 70kDa protein 4-like                                          |
| NM_021258                             | IL22RA1     | Interleukin 22 receptor, alpha 1                                         |
| NM_003740                             | KCNK5       | Potassium channel, subfamily K, member 5                                 |

|              |           |                                                                                         |
|--------------|-----------|-----------------------------------------------------------------------------------------|
| NM_198991    | KCTD1     | Potassium channel tetramerisation domain containing 1                                   |
| NM_018689    | KIAA1199  | KIAA1199 , colon cancer secreted protein 1                                              |
| NM_002776    | KLK10     | Kallikrein-relatedpeptidase 10                                                          |
| NM_144947    | KLK11     | Kallikrein-relatedpeptidase 11                                                          |
| THC2688670   | LOC646951 | similar to hCG1786685                                                                   |
| THC2669157   | OIT3      | Oncoprotein induced transcript 3                                                        |
| NM_032562    | PLA2G12B  | Phospholipase A2, group XIIB                                                            |
| NM_002657    | PLAGL2    | Pleiomorphic adenoma gene-like 2                                                        |
| NM_025225    | PNPLA3    | Patatin-like phospholipase domain containing 3                                          |
| NM_015352    | POFUT1    | Protein O-fucosyltransferase 1                                                          |
| NM_004163    | RAB27B    | RAB27B, member RAS oncogene family                                                      |
| NM_198232    | RNASE1    | Ribonuclease, RNase A family, 1                                                         |
| NM_153225    | RPESP     | RPE-spondin                                                                             |
| NM_002639    | SERPINB5  | Serpin peptidase inhibitor, clade B (ovalbumin), member 5                               |
| NM_019844    | SLCO1B3   | Solute carrier organic anion transporter family, member 1B3 (SLCO1B3), mRNA [NM_019844] |
| NR_003239    | SNHG11    | Small nucleolar RNA host gene (non-protein coding) 11                                   |
| NM_001034954 | SORBS1    | Sorbin and SH3 domain containing 1 (SORBS1)                                             |
| NM_145263    | SPATA18   | Spermatogenesis associated 18 homolog (rat)                                             |
| NM_001062    | TCN1      | Transcobalamin I (vitamin B12 binding protein, R binder family)                         |
| NM_022748    | TNS3      | Tensin 3                                                                                |
| NM_033342    | TRIM7     | Tripartite motif-containing 7                                                           |
| NM_130783    | TSPAN18   | Tetraspanin 18 (TSPAN18)                                                                |
| Unknown      | Unknown   | Unknown                                                                                 |
| NM_021197    | WFDC1     | WAP four-disulfide core domain 1                                                        |
| NM_013313    | YPEL1     | Yippee-like 1 (drosophila)                                                              |
| NM_080752    | ZSWIM3    | Zinc finger, SWIM-type containing 3                                                     |

**Table S2. Enriched molecular and cellular functions of the KRAS, BRAF and PIK3CA mutation signatures.** The enriched biological functions were analyzed using Ingenuity Pathways Analysis ([www.ingenuity.com](http://www.ingenuity.com)).

| <b>KRAS signature</b>                  |                     |                        |
|----------------------------------------|---------------------|------------------------|
| <b>Name</b>                            | <b>p-value</b>      | <b>Number of genes</b> |
| Cellular Movement                      | 1.04E-05 - 4.47E-02 | 8                      |
| Cellular Development                   | 6.23E-05 - 4.78E-02 | 15                     |
| Gene Expression                        | 4.61E-04 - 3.84E-02 | 6                      |
| Cell Morphology                        | 7.94E-04 - 4.47E-02 | 8                      |
| Lipid Metabolism                       | 1.07E-03 - 4.78E-02 | 10                     |
| <b>PIK3CA signature</b>                |                     |                        |
| <b>Name</b>                            | <b>p-value</b>      | <b>Number of genes</b> |
| Cell Cycle                             | 2.40E-03 - 1.67E-02 | 2                      |
| Cell Death                             | 2.40E-03 - 4.69E-02 | 4                      |
| Cell Morphology                        | 2.40E-03 - 3.07E-02 | 2                      |
| Cell-To-Cell Signaling and Interaction | 2.40E-03 - 4.92E-02 | 3                      |
| Cellular Assembly and Organization     | 2.40E-03 - 3.77E-02 | 2                      |
| <b>BRAF signature</b>                  |                     |                        |
| <b>Name</b>                            | <b>p-value</b>      | <b>Number of genes</b> |
| Cell Cycle                             | 8.03E-05 - 4.83E-02 | 10                     |
| Gene Expression                        | 4.37E-04 - 4.78E-02 | 5                      |
| Cellular Development                   | 2.47E-03 - 4.51E-02 | 9                      |
| Cellular Growth and Proliferation      | 2.47E-03 - 4.23E-02 | 13                     |
| Carbohydrate Metabolism                | 2.88E-03 - 1.15E-02 | 2                      |

**Table S3. Overlapping genes between EGFR-associated mutation gene signatures**

|               |             |               |             |
|---------------|-------------|---------------|-------------|
| <i>KRAS</i>   | <b>75</b>   |               |             |
| <i>PIKC3A</i> | 21          | <b>49</b>     |             |
| <i>BRAF</i>   | 6           | 11            | <b>58</b>   |
|               | <i>KRAS</i> | <i>PIKC3A</i> | <i>BRAF</i> |

**Table S4. Concordance analysis of AUC of specific mutation signatures with mutation status.** AUC was calculated from all 381 samples included. p-values refer to binomial exact test. Kappa= kappa statistics

| <b>AUC (n=381)</b>             | <b><i>KRAS</i> mutation</b>       | <b><i>BRAF</i> mutation</b>       | <b><i>PIK3CA</i> mutation</b>     |
|--------------------------------|-----------------------------------|-----------------------------------|-----------------------------------|
| <b><i>KRAS</i> signature</b>   | 0.77(p<0.0001)<br>Kappa = 0.324   | 0.76 (p <0.0001)<br>Kappa = 0.124 | 0.72 (p <0.0001)<br>Kappa = 0.086 |
| <b><i>BRAF</i> signature</b>   | 0.60 (p=0.0003)<br>Kappa = -0.096 | 0.94 (p <0.0001)<br>Kappa = 0.585 | 0.65 (p= 0.0002)<br>Kappa = 0.141 |
| <b><i>PIK3CA</i> signature</b> | 0.66 (p<0.0001)<br>Kappa = 0.236  | 0.87 (p<0.0001)<br>Kappa =0.259   | 0.76 (p <0.0001)<br>Kappa = 0.176 |
