# Supplementary material for: A combined oncogenic pathway signature of BRAF, KRAS and PI3KCA mutation improves colorectal cancer classification and cetuximab treatment prediction
Source: PubMed Central journal article supplement — Gut. 2012 Jul 14;62(4):540–9. doi: 10.1136/gutjnl-2012-302423 (PMC3596735; doi:10.1136/gutjnl-2012-302423), 2012-07-14
Supplement: gutjnl-2012-302423-s2.pdf [file gutjnl-2012-302423-s2.pdf]

**A. KRAS mutation signature P=0.004, HR=2.62**

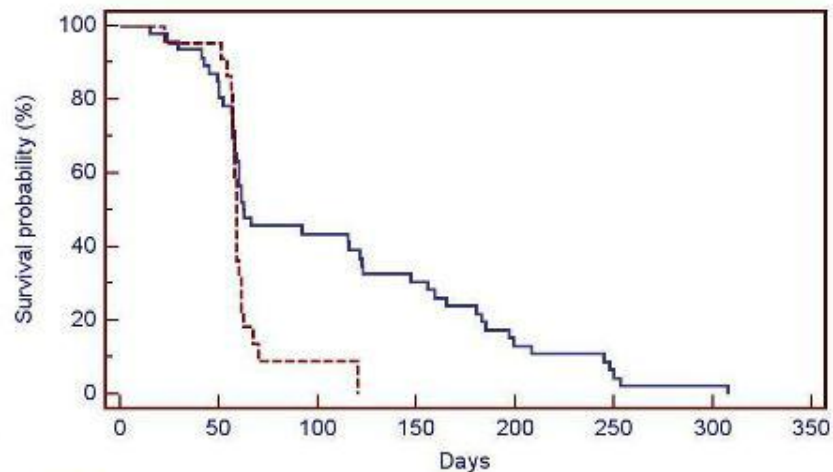

Number at risk

|          |    |    |    |    |   |   |   |   |
|----------|----|----|----|----|---|---|---|---|
| Group: 0 | 46 | 37 | 20 | 14 | 6 | 2 | 1 | 1 |
| Group: 1 | 22 | 21 | 2  | 0  | 0 | 0 | 0 | 0 |

**B. BRAF mutation signature P =0.018, HR=2.08**

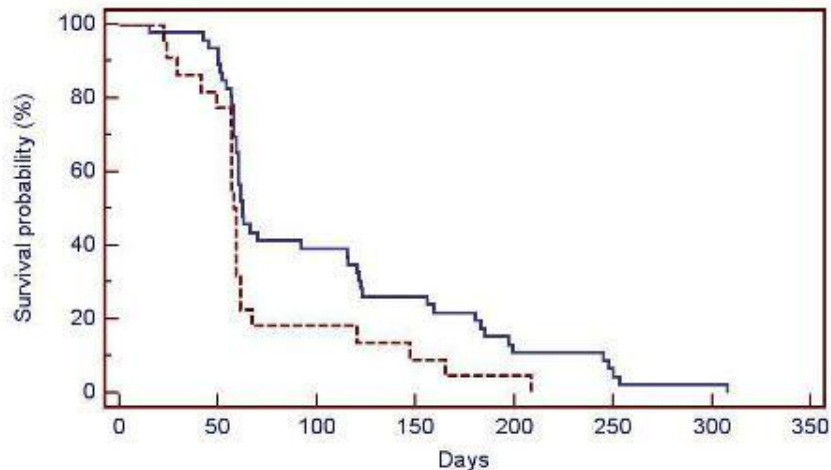

Number at risk

|          |    |    |    |    |   |   |   |   |
|----------|----|----|----|----|---|---|---|---|
| Group: 0 | 46 | 41 | 18 | 12 | 5 | 2 | 1 | 1 |
| Group: 1 | 22 | 17 | 4  | 2  | 1 | 0 | 0 | 0 |

**C. PIK3CA mutation signature P=0.003, HR=2.67**

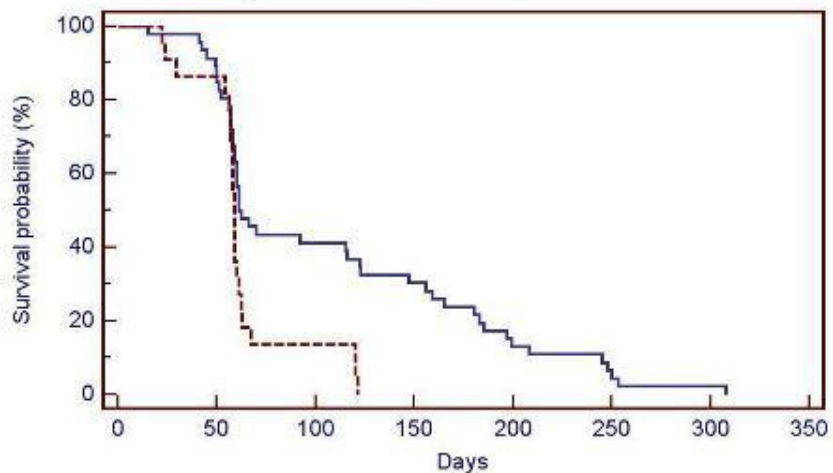

Number at risk

|          |    |    |    |    |   |   |   |   |
|----------|----|----|----|----|---|---|---|---|
| Group: 0 | 46 | 39 | 19 | 14 | 6 | 2 | 1 | 1 |
| Group: 1 | 22 | 19 | 3  | 0  | 0 | 0 | 0 | 0 |
